# Supplementary material
Source: Royal Society of Chemistry journal article supplement (doi:10.1039/d5tc04499e)
Supplement: d5tc04499e1.pdf [file d5tc04499e1.pdf]

Supporting Information to

**2-Aminobenzazolium Chlorocuprate(II) Complexes for Memristive Devices: Structural Studies,  
Synaptic Plasticity, and Random Number Generation**

by

Andrzej Sławek,<sup>a,\*</sup> Gisy Abd, <sup>a</sup> Ewelina Cechosz,<sup>a</sup> Marta Janioł,<sup>a</sup> Sidra Muzaffar,<sup>a</sup> Krzysztof Mech,<sup>a</sup> Alexey Maximenko,<sup>b</sup> Anna Dołęga,<sup>c</sup> Takuya Matsumoto,<sup>d</sup> and Konrad Szaciłowski<sup>a</sup>

<sup>a</sup> Academic Centre for Materials and Nanotechnology, AGH University of Krakow, ul. Kawiory 30, 30-055 Kraków, Poland

<sup>b</sup> National Synchrotron Radiation Centre SOLARIS, Jagiellonian University, ul. Czerwone Maki 98, 30-392 Kraków, Poland

<sup>c</sup> Department of Inorganic Chemistry, Chemical Faculty, Gdansk University of Technology, ul. Narutowicza 11/12, 80-233 Gdańsk, Poland

<sup>d</sup> Department of Chemistry, Graduate School of Science, Osaka University, 1-1 Machikaneyama, Osaka, Toyonaka, 560-0043, Japan

|                                                                                                                                                                                                                                                                                                                               |    |
|-------------------------------------------------------------------------------------------------------------------------------------------------------------------------------------------------------------------------------------------------------------------------------------------------------------------------------|----|
| Contents                                                                                                                                                                                                                                                                                                                      | 5  |
| <b>Figure S1.</b> The optimized geometries of the studied cations: <b>THIA</b> (top), <b>OXA</b> (middle), and <b>IMI</b> (bottom) are presented on the left side together with the corresponding HOMO (middle) and LUMO (right) frontier orbitals.                                                                           | 5  |
| <b>Table S1.</b> Crystal and refinement data for the studied compounds.                                                                                                                                                                                                                                                       | 6  |
| <b>Table S2.</b> Selected bond lengths and angles in the studied compounds. The data for <b>OXA</b> and <b>THIA</b> come from the diffraction experiment, and the data for <b>IMI</b> were optimized using DFT calculations.                                                                                                  | 6  |
| <b>Table S3.</b> Hydrogen bonds parameters for <b>OXA</b> and <b>THIA</b> .                                                                                                                                                                                                                                                   | 7  |
| <b>Figure S2.</b> One of the frames registered during the diffraction measurement of crystals of <b>IMI</b> .                                                                                                                                                                                                                 | 7  |
| <b>Figure S3.</b> Hydrogen bonding network in <b>IMI</b> .                                                                                                                                                                                                                                                                    | 8  |
| <b>Figure S4.</b> Deconvolution of the UV-Vis-NIR absorption spectra for <b>THIA</b> (a), <b>OXA</b> (b), and <b>IMI</b> (c) chlorocuprate(II) complexes into their Gaussian components. Spectra were measured as reflectance of powders in BaSO <sub>4</sub> .                                                               | 9  |
| <b>Figure S5.</b> Kubelka-Munk function versus energy for determination of band gap for the studied <b>THIA</b> , <b>OXA</b> , and <b>IMI</b> chlorocuprates(II). The band gaps are equal to                                                                                                                                  | 9  |
| <b>Figure S6.</b> DFT-calculated band structures (left) and PDOS (right) for the studied chlorocuprate (II) complexes with <b>THIA</b> (a), <b>OXA</b> (b), and <b>IMI</b> (c). The band gaps are 2.54 eV, 3.24 eV, and 2.88 eV, respectively. The Fermi level is marked with a red dotted line.                              | 10 |
| <b>Figure S7.</b> FT-IR spectra recorded for the powdered samples of the studied chlorocuprate(II) complexes with 2-aminobenzazoles <b>THIA</b> , <b>OXA</b> , and <b>IMI</b> . The lines corresponding to particular assignments were centered at positions coloured in Table S4 with red colour.                            | 11 |
| <b>Table S4.</b> Assignments of peaks observed in FT-IR spectra recorded for <b>THIA</b> , <b>OXA</b> , and <b>IMI</b> samples are presented in <b>Figure S7</b> .                                                                                                                                                            | 11 |
| <b>Figure S8.</b> SEM images of the studied layers of chlorocuprate (II) complexes with 2-aminobenzazolium: a) <b>THIA</b> , b) <b>OXA</b> , and c) <b>IMI</b> on ITO.                                                                                                                                                        | 12 |
| <b>Figure S9.</b> Cu K-edge spectra derivative with respect to energy for the 2-aminobenzazolium chlorocuprate(II) complexes <b>THIA</b> , <b>OXA</b> , and <b>IMI</b> (a) and the reference compounds CuCl <sub>2</sub> and (NH <sub>4</sub> ) <sub>2</sub> CuCl <sub>4</sub> ·H <sub>2</sub> O.                             | 12 |
| <b>Figure S10.</b> Full range Cu K-edge spectra of the studied 2-aminobenzazolium chlorocuprate(II) complexes: <b>THIA</b> (a), <b>OXA</b> (b), and <b>IMI</b> (c). Close-ups of the XANES region with the DFT-calculated spectra are presented in the inset figures.                                                         | 13 |
| <b>Figure S11.</b> Cu K-edge EXAFS $\chi(k)k^2$ (a,c) and their Fourier transforms (b,d) for the 2-aminobenzazolium chlorocuprate(II) complexes: <b>THIA</b> , <b>OXA</b> , and <b>IMI</b> (a,b) and the reference compounds CuCl <sub>2</sub> and (NH <sub>4</sub> ) <sub>2</sub> CuCl <sub>4</sub> ·H <sub>2</sub> O (c,d). | 13 |
| <b>Figure S12.</b> Log-log current–voltage characteristics of memristive devices based on the studied 2-aminobenzazolium chlorocuprate(II) complexes: <b>THIA</b> (a), <b>OXA</b> (b), and <b>IMI</b> (c). The scans were recorded at a rate of 25 mV/s.                                                                      | 14 |

|                                                                                                                                                                                                                                                                                                                                                                                        |    |
|----------------------------------------------------------------------------------------------------------------------------------------------------------------------------------------------------------------------------------------------------------------------------------------------------------------------------------------------------------------------------------------|----|
| <b>Figure S13.</b> Current–voltage characteristics of memristive devices with different scan rates based on the studied 2-aminobenzazolium chlorocuprate(II) complexes: <b>THIA</b> (a), <b>OXA</b> (b), and <b>IMI</b> (c). .....                                                                                                                                                     | 14 |
| <b>Figure S14.</b> Current–voltage characteristics of memristive devices based on the studied 2-aminobenzazole chlorocuprates(II) complexes: <b>THIA</b> (a), <b>OXA</b> (b), and <b>IMI</b> (c) with different top electrodes: Cu (a-c), Ag (d-f), and Au (g-i). .....                                                                                                                | 15 |
| <b>Figure S15.</b> Nyquist plots showing experimental (points) and simulated (lines) results from electrochemical impedance spectroscopy (EIS) for the studied devices based on 2-aminobenzazoles chlorocuprates(II) complexes: <b>THIA</b> (a), <b>OXA</b> (b), and <b>IMI</b> (c) for LRS and HRS. The inset of a) shows the equivalent circuit model used for the simulations. .... | 15 |
| <b>Figure S17.</b> Arrhenius plots showing the temperature dependence of the natural logarithm of conductance (in mS) collected at +2 V (HRS) and -2 V (LRS). .....                                                                                                                                                                                                                    | 16 |
| <b>Figure S18.</b> Chronoamperometric experiments showing repeated switching between HRS and LRS of devices based on 2-aminobenzazoles chlorocuprates(II) complexes: <b>THIA</b> (a), <b>OXA</b> (b), and <b>IMI</b> (c). The period of the cycle was 0.8 s. Read voltage equal to +0.2 V. ....                                                                                        | 17 |
| <b>Figure S19.</b> Chronoamperometric experiments showing repeated switching between HRS and LRS of devices based on 2-aminobenzazoles chlorocuprates(II) complexes: <b>THIA</b> (a), <b>OXA</b> (b), and <b>IMI</b> (c). The period of the cycle was 0.8 s. Read voltage equal to -0.2 V. ....                                                                                        | 17 |
| <b>Figure S20.</b> Chronoamperometric experiments showing retention time of LRS for the studied devices based on 2-aminobenzazoles chlorocuprates(II) complexes: <b>THIA</b> (a), <b>OXA</b> (b), and <b>IMI</b> (c). Figure a) inset shows the voltage change curve. ....                                                                                                             | 17 |
| <b>Figure S21.</b> Potentiation (P) and depression (D) experiments for prepared devices based on 2-aminobenzazoles chlorocuprates(II) complexes: <b>THIA</b> (a, b), <b>OXA</b> (c, d), and <b>IMI</b> (e, f) with different pulse sequences of different widths (top: 0.001 s or bottom: 0.01 s) and amplitudes (in legend: 0.4-1.6 V).....                                           | 18 |
| <b>References</b> .....                                                                                                                                                                                                                                                                                                                                                                | 18 |

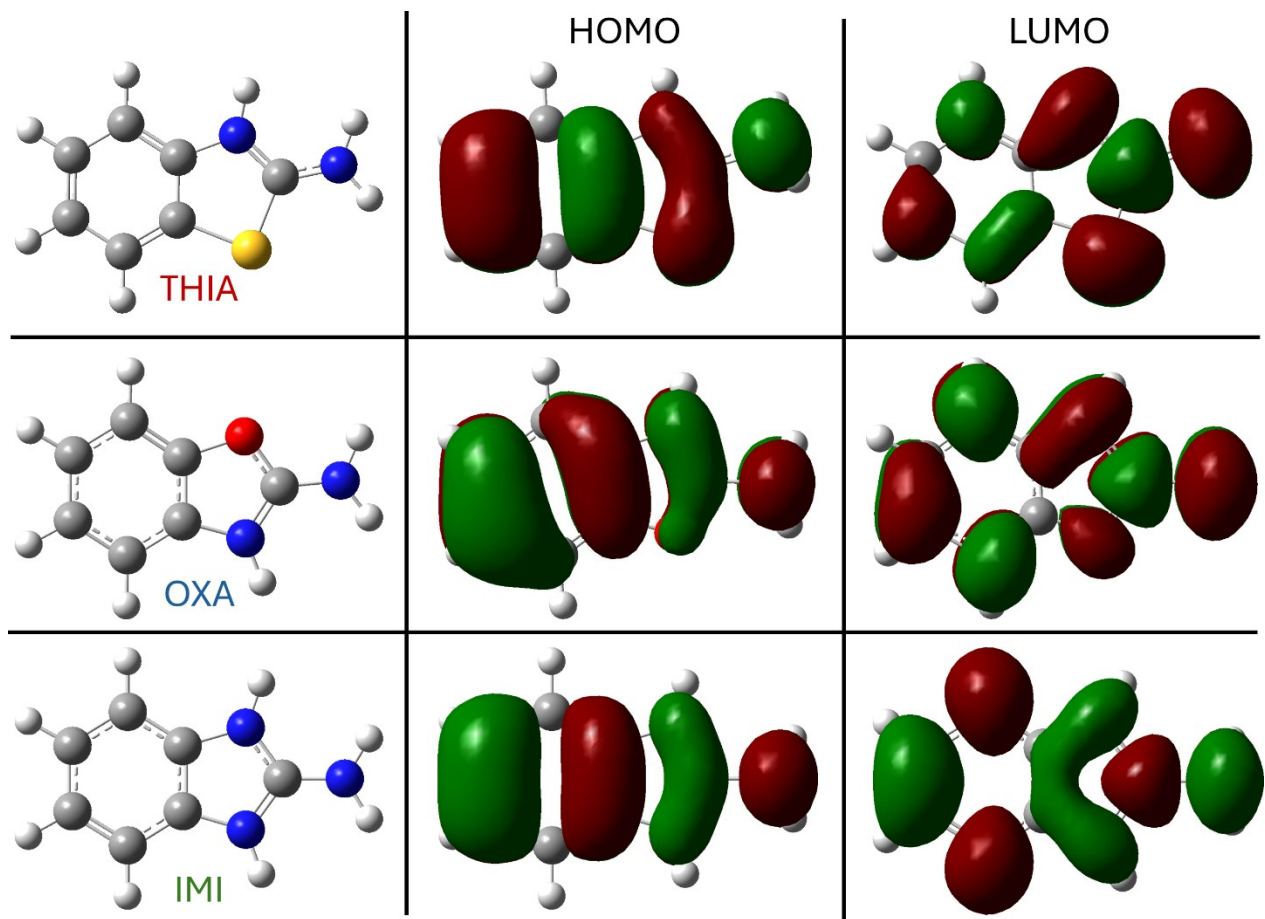

**Figure S1.** The optimized geometries of the studied cations: **THIA** (top), **OXA** (middle), and **IMI** (bottom) are presented on the left side together with the corresponding HOMO (middle) and LUMO (right) frontier orbitals.

**Table S1.** Crystal and refinement data for the studied compounds.

| Compound                                         | OXA                                                                             | THIA                                                                            | IMI                                                              |
|--------------------------------------------------|---------------------------------------------------------------------------------|---------------------------------------------------------------------------------|------------------------------------------------------------------|
| Empirical formula                                | C <sub>14</sub> H <sub>14</sub> Cl <sub>4</sub> CuN <sub>4</sub> O <sub>2</sub> | C <sub>14</sub> H <sub>14</sub> Cl <sub>4</sub> CuN <sub>4</sub> S <sub>2</sub> | C <sub>21</sub> H <sub>21</sub> Cl <sub>5</sub> CuN <sub>9</sub> |
| Formula weight (g mol <sup>-1</sup> )            | 475.63                                                                          | 507.75                                                                          | 640.26                                                           |
| Wavelength (Å)                                   | 0.71073                                                                         | 0.71073                                                                         | 1.54186                                                          |
| Temperature (K)                                  | 120(2)                                                                          | 120(2)                                                                          | 120(2)                                                           |
| Crystal system                                   | monoclinic                                                                      | monoclinic                                                                      | hexagonal                                                        |
| Space group                                      | C 2/c                                                                           | P 2 <sub>1</sub> /c                                                             | P -6                                                             |
| a (Å)                                            | 17.4866(7)                                                                      | 6.9352(3)                                                                       | 13.6407(5)                                                       |
| b (Å)                                            | 8.7279(5)                                                                       | 9.7138(4)                                                                       | 13.6407(5)                                                       |
| c (Å)                                            | 12.0090(5)                                                                      | 13.9419(6)                                                                      | 8.1276(2)                                                        |
| α (°)                                            | 90                                                                              | 90                                                                              | 90                                                               |
| β (°)                                            | 96.365(3)                                                                       | 97.775(3)                                                                       | 90                                                               |
| γ (°)                                            | 90                                                                              | 90                                                                              | 120                                                              |
| Volume (Å <sup>3</sup> )                         | 1821.53(15)                                                                     | 930.59(7)                                                                       | 1309.68(10)                                                      |
| Z                                                | 4                                                                               | 2                                                                               | 2                                                                |
| Calculated density (g cm <sup>-3</sup> )         | 1.734                                                                           | 1.812                                                                           | 1.624                                                            |
| Crystal size (mm)                                | 0.380x 0.307x 0.227                                                             | 0.124x 0.097x 0.077                                                             | 0.308x 0.221x 0.161                                              |
| Absorption coefficient (mm <sup>-1</sup> )       | 1.802                                                                           | 1.978                                                                           | 1.37                                                             |
| F(000)                                           | 956                                                                             | 510                                                                             | 648                                                              |
| θ range (°)                                      | 2.34 to 29.64                                                                   | 2.563 to 29.203                                                                 | 2.51 to 29.52                                                    |
| Limiting indices                                 | -23≤h≤23<br>-11≤k≤11<br>-16≤l≤16                                                | -8≤h≤9<br>-13≤k≤13<br>-19≤l≤19                                                  | -18≤h≤9<br>0≤k≤18<br>0≤l≤11                                      |
| Reflections collected / unique/unique [I>2σ(I)]  | 11459, 2463, 2167                                                               | 11965, 2512, 2302                                                               | 23931, 2521, 2083                                                |
| R <sub>int</sub>                                 | 0.0303                                                                          | 0.0215                                                                          | 0.0184                                                           |
| Completeness to θ <sub>max</sub> (%)             | 99.3                                                                            | 99.1                                                                            | -                                                                |
| Data / restraints / parameters                   | 2463 / 0 / 126                                                                  | 2512 / 0 / 127                                                                  | -                                                                |
| Goodness-of-fit on F <sup>2</sup>                | 1.050                                                                           | 1.078                                                                           | -                                                                |
| Final R indices [I>2σ(I)]                        | R <sub>1</sub> = 0.0356<br>wR <sub>2</sub> = 0.0898                             | R <sub>1</sub> = 0.0267<br>wR <sub>2</sub> = 0.0635                             | -                                                                |
| R indices (all data)                             | R <sub>1</sub> = 0.0432<br>wR <sub>2</sub> = 0.0965                             | R <sub>1</sub> = 0.0306<br>wR <sub>2</sub> = 0.066                              | -                                                                |
| Largest diff. peak and hole (e Å <sup>-3</sup> ) | 0.443/-0.828                                                                    | 0.410/-0.605                                                                    | -                                                                |
| CCDC deposition number                           | 2471018                                                                         | 2471019                                                                         | -                                                                |

**Table S2.** Selected bond lengths and angles in the studied compounds. The data for OXA and THIA come from the diffraction experiment, and the data for IMI were optimized using DFT calculations.

| Compound                                 | OXA         | THIA                    | IMI         |
|------------------------------------------|-------------|-------------------------|-------------|
|                                          |             | <b>Bond lengths [Å]</b> |             |
| Cu1/Cu2*–Cl1/Cl6*                        | 2.2399(5)   | 2.2718(4)               | 2.331/2.325 |
| Cu1/Cu2*–Cl2/Cl7*                        | 2.2580(6)   | 2.2745(4)               | 2.341/2.334 |
| Cu1/Cu2*–Cl3/Cl8*                        |             |                         | 2.426/2.398 |
| Cu1/Cu2*–Cl4/Cl9*                        |             |                         | 2.401/2.397 |
| Cu1/Cu2*–Cl5/Cl10*                       |             |                         | 2.406/2.422 |
|                                          |             | <b>Bond angles [°]</b>  |             |
| Cl1–Cu1–Cl2                              | 126.269(19) | 89.628(16)              | 179.29      |
| Cl1–Cu1–Cl1 <sup>i</sup> /Cl3*           |             | 179.999(18)             | 91.19       |
| Cl3*/Cl1 <sup>ii</sup> –Cu1–Cl1/Cl4*     | 102.76(3)   |                         | 118.14      |
| Cl1 <sup>ii</sup> –Cu1–Cl2               | 101.972(19) |                         |             |
| Cl1 <sup>ii</sup> –Cu1–Cl2 <sup>ii</sup> | 126.27(2)   |                         |             |
| Cl1–Cu1–Cl2 <sup>ii</sup>                | 101.971(19) |                         |             |
| Cl2 <sup>ii</sup> –Cu1–Cl2 <sup>ii</sup> | 100.40(3)   |                         |             |

\*IMI; <sup>i</sup> -x+1, -y+2, -z+1; <sup>ii</sup> -x+1, y, -z+0.5

**Table S3.** Hydrogen bonds parameters for **OXA** and **THIA**.

| Compound    | H-Bond                    | D–H [Å] | H…A [Å] | D…A [Å]    | D–H–A [°] |
|-------------|---------------------------|---------|---------|------------|-----------|
| <b>OXA</b>  | N1–H1…Cl1                 | 0.78(4) | 2.46(4) | 3.184(2)   | 154(3)    |
|             | N2–H2A…Cl1 <sup>i</sup>   | 0.83(4) | 2.90(4) | 3.325(2)   | 114(3)    |
|             | N2–H2A…Cl2 <sup>ii</sup>  | 0.83(4) | 2.51(3) | 3.267(2)   | 151(3)    |
|             | N2–H2B…Cl2 <sup>iii</sup> | 0.92(3) | 2.33(3) | 3.228(2)   | 164(3)    |
| <b>THIA</b> | N1–H1…Cl1                 | 0.73(2) | 2.41(2) | 3.1327(17) | 171.1(19) |
|             | N2–H2A…Cl1 <sup>iv</sup>  | 0.83(3) | 2.69(3) | 3.3535(18) | 138(2)    |
|             | N2–H2A…Cl2 <sup>iv</sup>  | 0.83(3) | 2.51(3) | 3.2406(18) | 146(3)    |
|             | N2–H2B…Cl2 <sup>v</sup>   | 0.82(3) | 2.38(3) | 3.1957(19) | 174(3)    |

<sup>i</sup>  $-x+1, -y+1, -z+1$ ; <sup>ii</sup>  $-x+1, y, -z+0.5$ ; <sup>iii</sup>  $x, -y, z+0.5$ ; <sup>iv</sup>  $x, -y+1.5, z-0.5$ ; <sup>v</sup>  $-x+1, -y+2, -z+1$

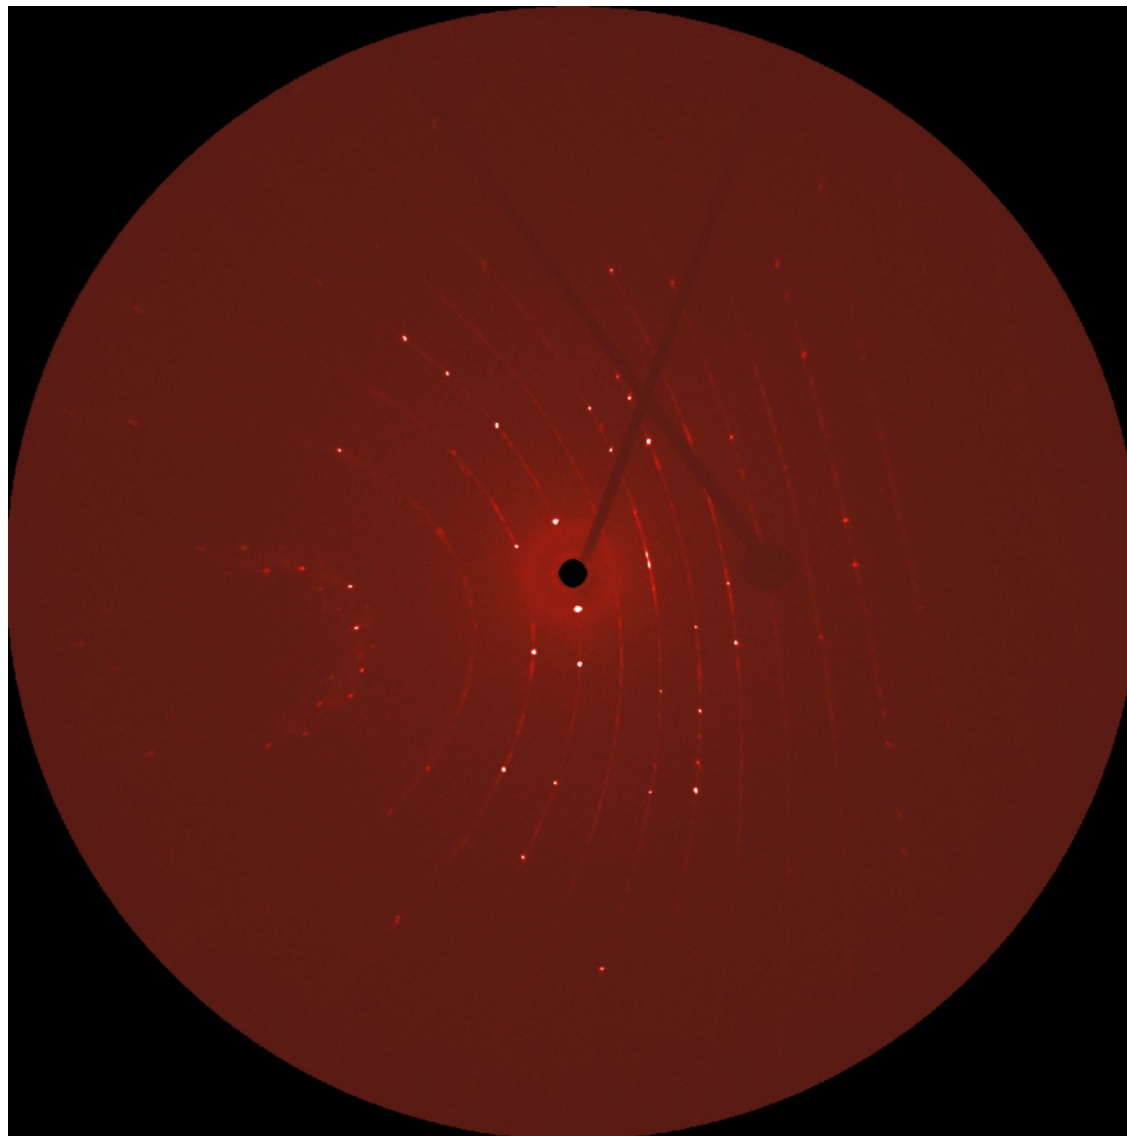**Figure S2.** One of the frames registered during the diffraction measurement of crystals of **IMI**.

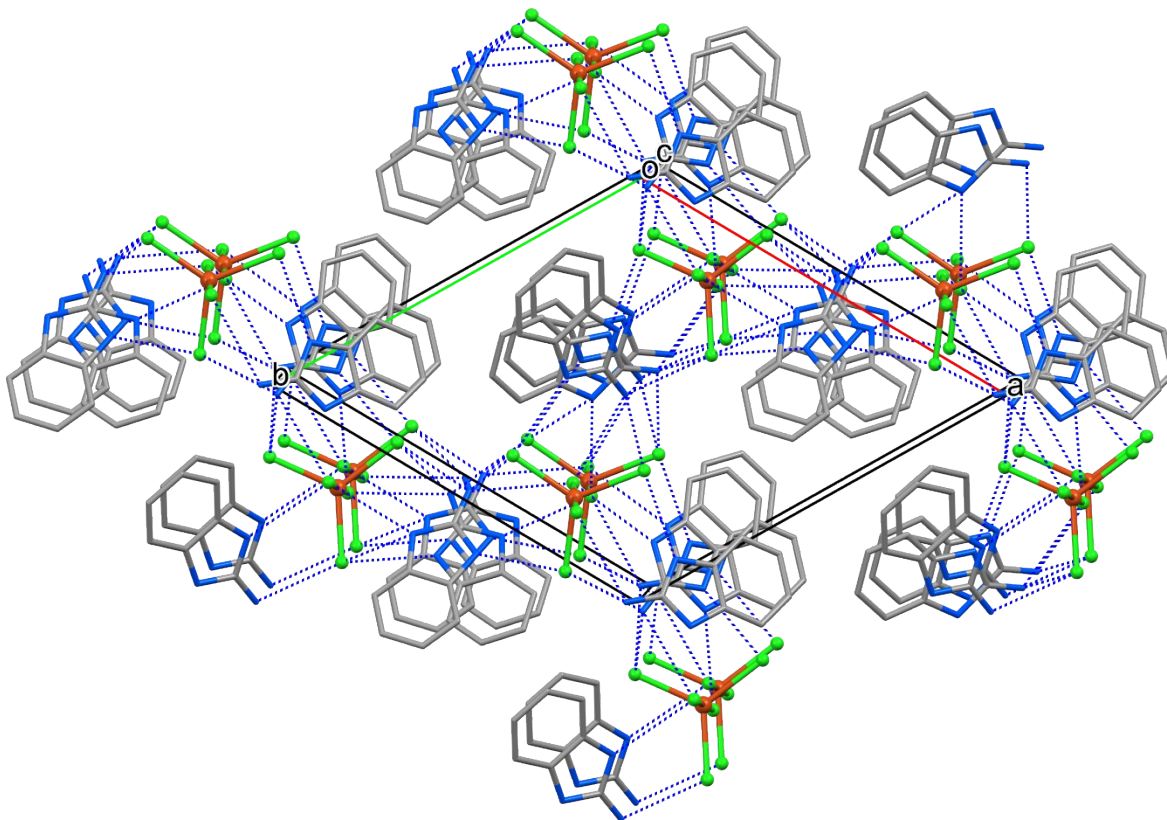

**Figure S3.** Hydrogen bonding network in IMI.

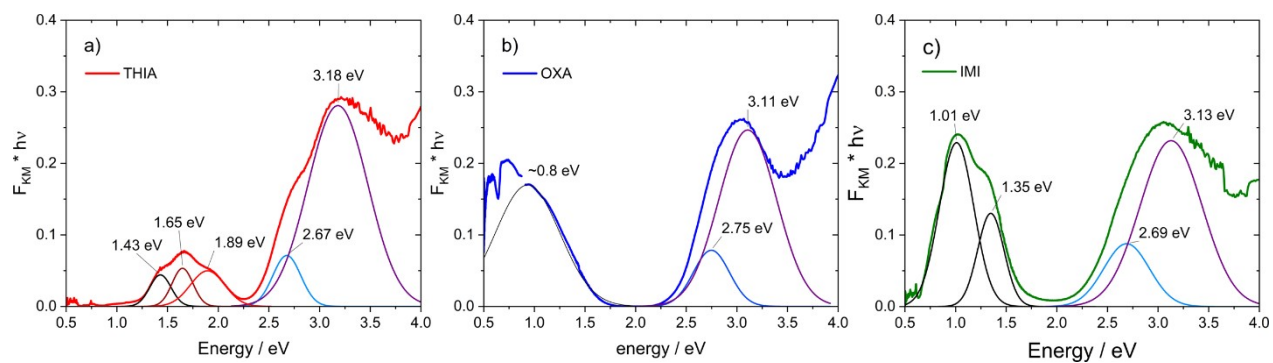

**Figure S4.** Deconvolution of the UV-Vis-NIR absorption spectra for **THIA** (a), **OXA** (b), and **IMI** (c) chlorocuprate(II) complexes into their Gaussian components. Spectra were measured as reflectance of powders in BaSO<sub>4</sub>.

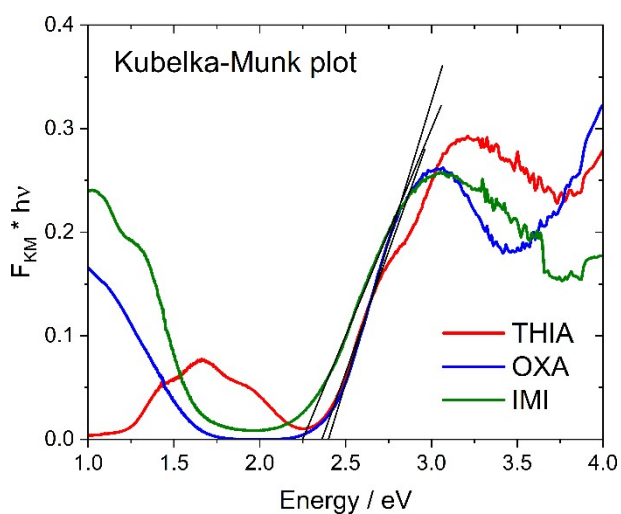

**Figure S5.** Kubelka-Munk function versus energy for determination of band gap for the studied **THIA**, **OXA**, and **IMI** chlorocuprates(II). The band gaps are equal to

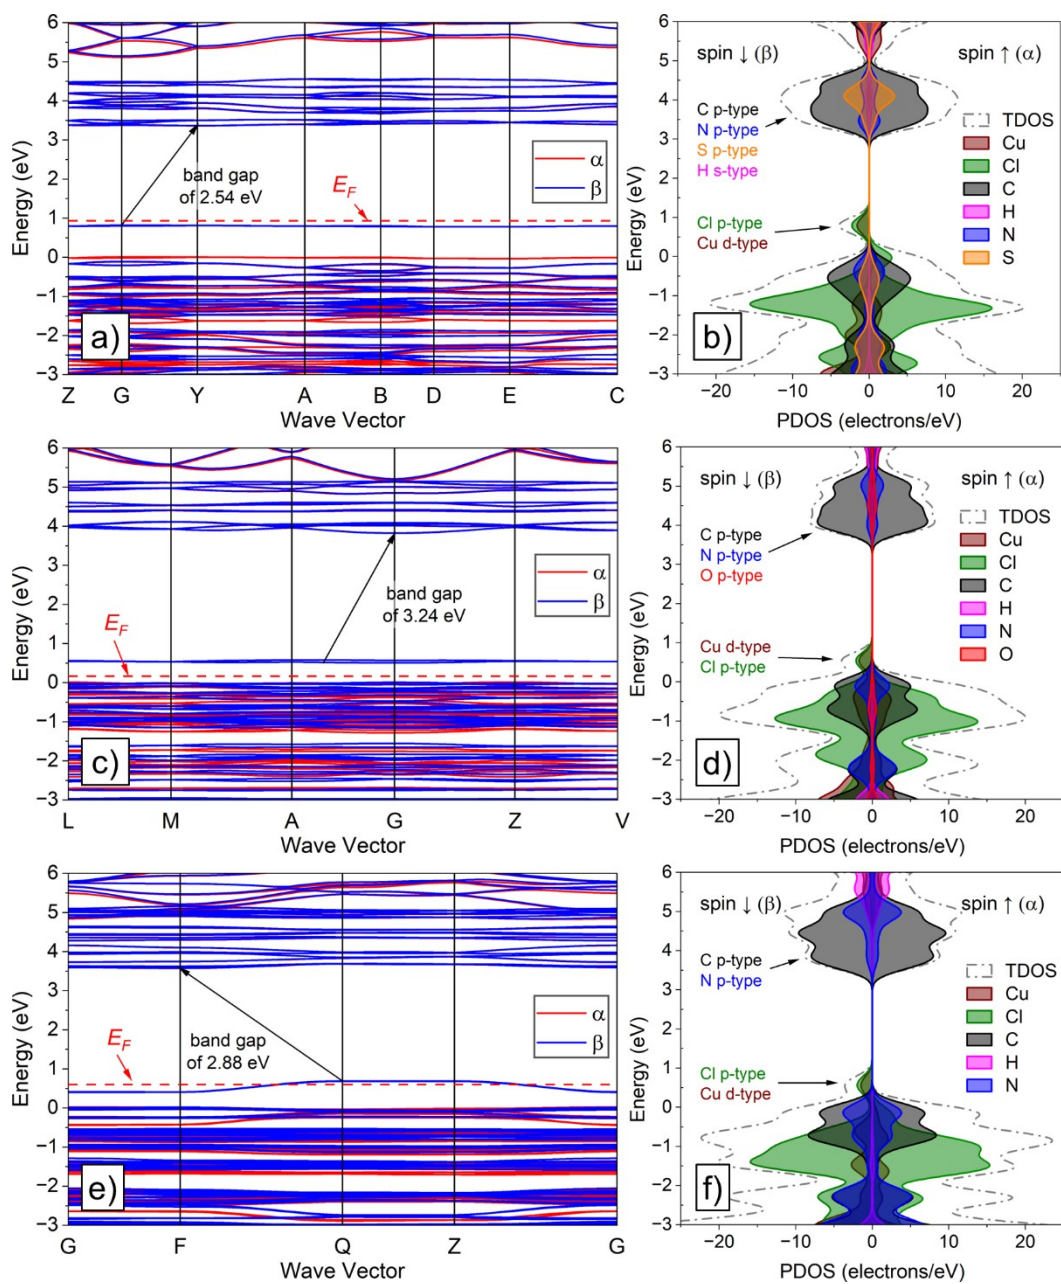

**Figure S6.** DFT-calculated band structures (left) and PDOS (right) for the studied chlorocuprate (II) complexes with **THIA** (a), **OXA** (b), and **IMI** (c). The band gaps are 2.54 eV, 3.24 eV, and 2.88 eV, respectively. The Fermi level is marked with a red dotted line.

**Table S6.** The values of experimental and DFT-calculated band gaps for the studied 2-aminobenzazoles chlorocuprates(II) complexes: **THIA** (a), **OXA** (b), and **IMI** (c) are compared with gap types and effective masses of holes ( $m_h$ ) and electrons ( $m_e$ ), as well as intrinsic carrier concentrations ( $n_i$ ).

|      | Exp. Band gap (eV) | Theor. band gap (eV) | Gap type | $m_h/m_0$ | $m_e/m_0$ | $n_i$ (cm <sup>-3</sup> ) |
|------|--------------------|----------------------|----------|-----------|-----------|---------------------------|
| THIA | 2.36               | 2.54                 | Indirect | 31.9      | 9.7       | $7.5 \times 10^{-1}$      |
| OXA  | 2.40               | 3.24                 | Indirect | 7.5       | 1.5       | $8.8 \times 10^{-9}$      |
| IMI  | 2.25               | 2.88                 | Indirect | 3.3       | 3.6       | $9.0 \times 10^{-5}$      |

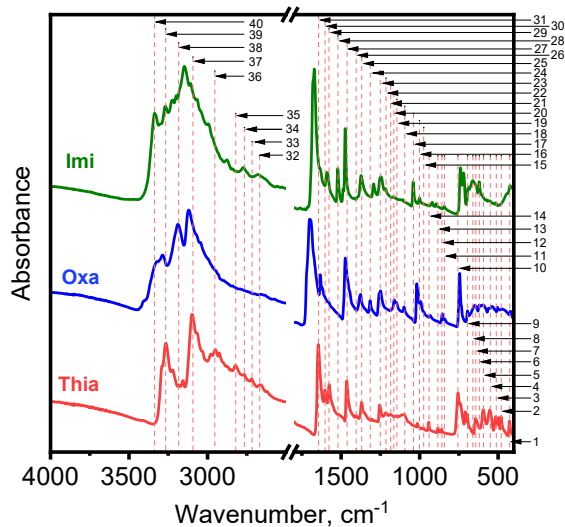

**Figure S7.** FT-IR spectra recorded for the powdered samples of the studied chlorocuprate(II) complexes with 2-aminobenzazoles **THIA**, **OXA**, and **IMI**. The lines corresponding to particular assignments were centered at positions coloured in Table S4 with red colour.

**Table S4.** Assignments of peaks observed in FT-IR spectra recorded for **THIA**, **OXA**, and **IMI** samples are presented in **Figure S7**.

| Peak no | Position, cm <sup>-1</sup> |      |      | Assignment                                     | Ref* |
|---------|----------------------------|------|------|------------------------------------------------|------|
|         | Thia                       | Oxa  | Imi  |                                                |      |
| 1       | 426                        | 421  | 420  | (N-CN) wagging                                 | 1    |
| 2       | 480                        | –    | –    | (C-C) deformation,<br>(C-S-C) in-plane bending | 1-2  |
| 3       | 512                        | 503  | 514  | C-C-C out of plane bending                     | 1    |
| 4       | 550                        | 536  | –    | (N-C) deformation                              | 2    |
| 5       | 593                        | 593  | –    | (C-S) stretching                               | 1-2  |
| 6       | –                          | 620  | 620  | (C-C-C) out-of-plane bending                   | 1    |
| 7       | 642                        | –    | –    | (C-S) stretching                               | 2    |
| 8       | –                          | 649  | 661  |                                                |      |
| 9       | 701                        | 695  | 695  | (C-N-H) bending                                | 2    |
| 10      | 756                        | 743  | 739  | (C-N-H) bending                                | 2    |
| 11      | –                          | 842  | 842  |                                                |      |
| 12      | 858                        | 857  | –    | (C-N-H) bending                                | 2    |
| 13      | 884                        | 883  | 893  | (C-N) asymmetric stretching                    | 2    |
| 14      | 940                        | 930  | 919  | (C-C-H) bending                                | 2    |
| 15      | 974                        |      |      | (C-H) out-of-plane bending                     | 1    |
| 16      |                            | 991  | 1001 | (C-C-H) bending                                | 2    |
| 17      | 1014                       | 1019 | 1039 | (C-H) out-of-plane bending                     | 1    |
| 18      | 1095                       | 1098 | 1107 | (C-C-H) bending                                | 2    |
| 19      | 1150                       | 1145 | 1151 | (C-H) in-plane bending                         | 1    |
| 20      | –                          | 1164 | 1164 | (C-H) in-plane bending                         | 1    |
| 21      | 1184                       |      |      | (C-H) in-plane bending                         | 1    |
| 22      | 1214                       |      | 1215 | (C-H) in-plane bending                         | 1    |
| 23      | 1251                       | 1247 | 1245 | (C-C-H) bending                                | 1-2  |
|         |                            |      |      | (C-H) in-plane bending                         |      |
| 24      | 1303                       | 1315 | 1294 | (C-C) stretching                               | 1    |
| 25      | 1369                       | 1377 | 1374 | (C=C) asymmetric stretching                    | 2    |
| 26      | 1404                       |      |      | (C-C) stretching                               | 1    |
| 27      | 1462                       | 1474 | 1474 | (N-H) bending                                  | 2    |

|    |      |      |      |                                          |   |
|----|------|------|------|------------------------------------------|---|
| 28 | –    | –    | 1520 | (NH <sub>2</sub> ) symmetric bending     | 2 |
| 29 | 1577 | 1575 | 1588 | (NH <sub>2</sub> ) symmetric bending     | 2 |
| 30 | 1602 | 1633 |      | (C=N) stretching                         | 1 |
| 31 | 1644 | 1696 | 1672 | (NH <sub>2</sub> ) asymmetric bending    | 2 |
| 32 | 2667 | –    | 2679 |                                          |   |
| 33 | 2716 | –    | –    |                                          |   |
| 34 | 2765 | –    | 2765 |                                          |   |
| 35 | 2820 | –    | 2876 |                                          |   |
| 36 | 2953 | –    | 2994 | (C-H) stretching                         | 2 |
| 37 | 3093 | 3120 | 3141 | (N-H) stretching                         | 2 |
| 38 | –    | 3184 | –    | (NH <sub>2</sub> ) symmetric stretching  | 2 |
| 39 | 3266 | 3288 | 3270 | (NH <sub>2</sub> ) symmetric stretching  | 2 |
| 40 | –    | –    | 3337 | (NH <sub>2</sub> ) asymmetric stretching | 2 |

\* Kessentini et al.,<sup>2</sup> Sathyanarayanmoorthi et al. and <sup>1</sup>.

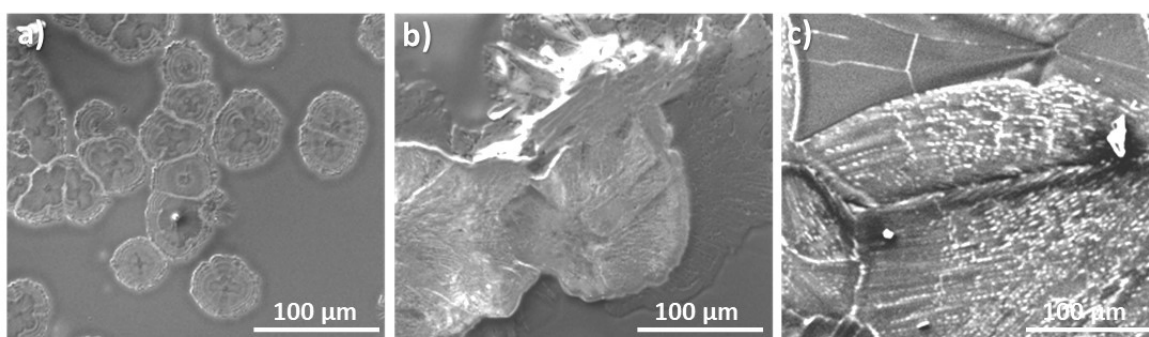

Figure

**e S8.** SEM images of the studied layers of chlorocuprate (II) complexes with 2-aminobenzazolium: a) **THIA**, b) **OXA**, and c) **IMI** on ITO.

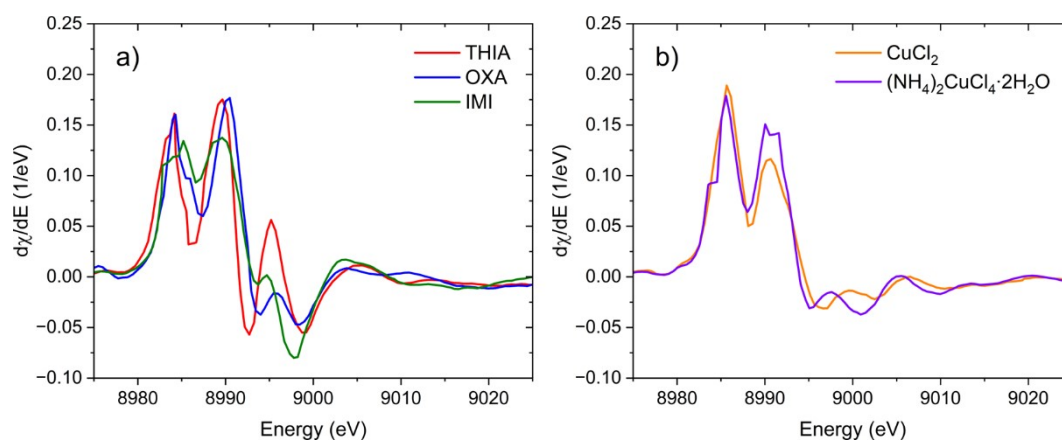

**Figure S9.** Cu K-edge spectra derivative with respect to energy for the 2-aminobenzazolium chlorocuprate(II) complexes **THIA**, **OXA**, and **IMI** (a) and the reference compounds  $\text{CuCl}_2$  and  $(\text{NH}_4)_2\text{CuCl}_4 \cdot 2\text{H}_2\text{O}$ .

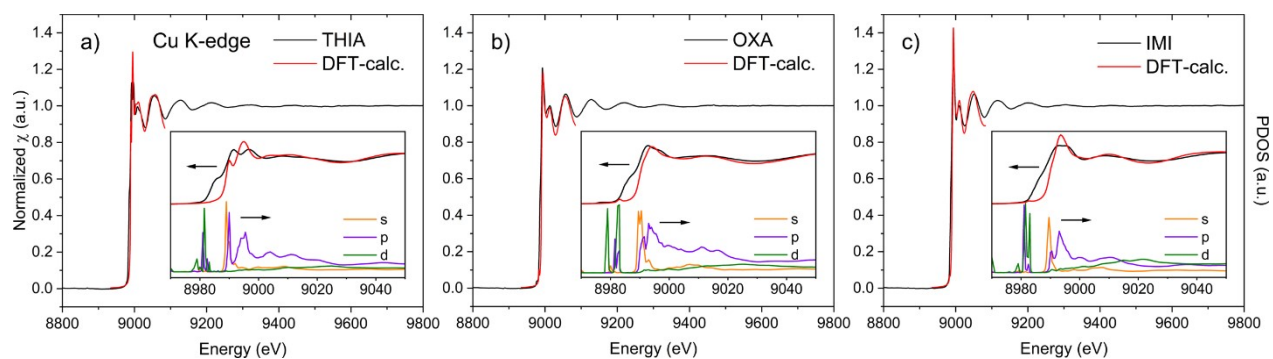

**Figure S10.** Full range Cu K-edge spectra of the studied 2-aminobenzazolium chlorocuprate(II) complexes: **THIA** (a), **OXA** (b), and **IMI** (c). Close-ups of the XANES region with the DFT-calculated spectra are presented in the inset figures.

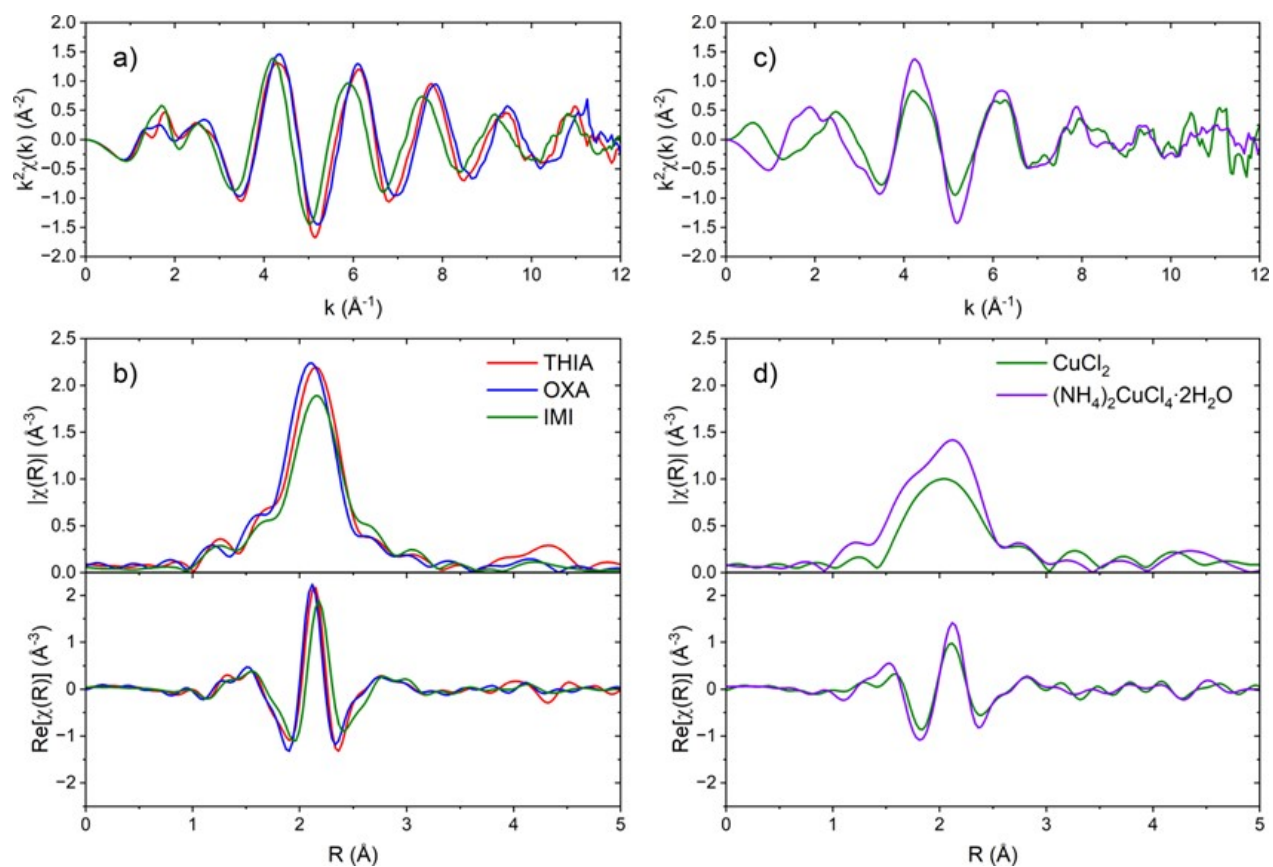

**Figure S11.** Cu K-edge EXAFS  $\chi(k)k^2$  (a,c) and their Fourier transforms (b,d) for the 2-aminobenzazolium chlorocuprate(II) complexes: **THIA**, **OXA**, and **IMI** (a,b) and the reference compounds  $\text{CuCl}_2$  and  $(\text{NH}_4)_2\text{CuCl}_4 \cdot 2\text{H}_2\text{O}$  (c,d).

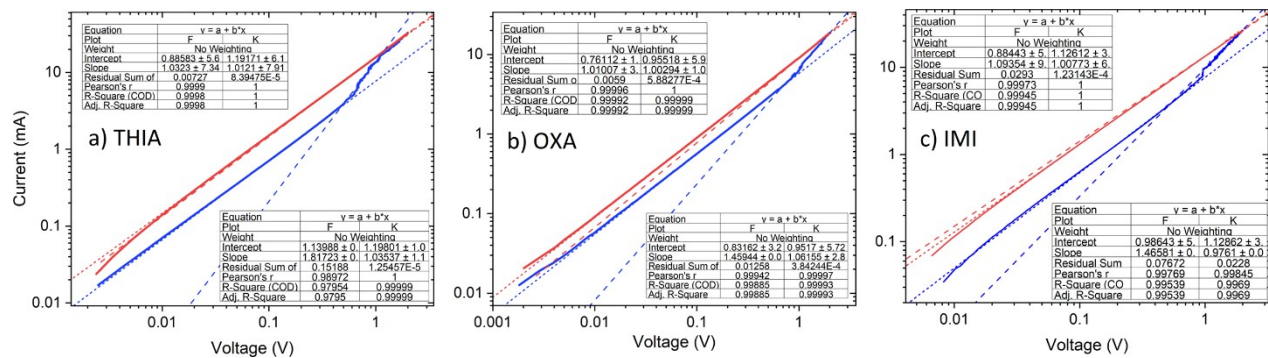

**Figure S12.** Log-log current–voltage characteristics of memristive devices based on the studied 2-aminobenzazoliium chlorocuprate(II) complexes: **THIA** (a), **OXA** (b), and **IMI** (c). The scans were recorded at a rate of 25 mV/s.

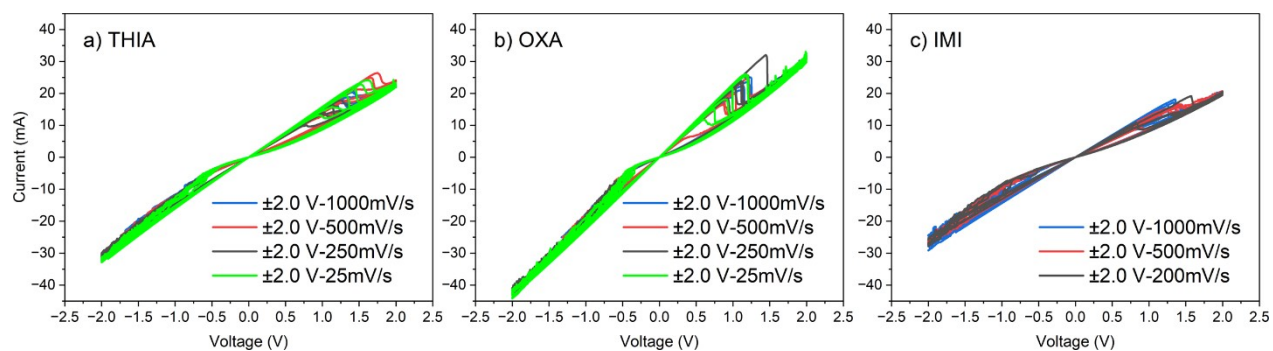

**Figure S13.** Current–voltage characteristics of memristive devices with different scan rates based on the studied 2-aminobenzazoliium chlorocuprate(II) complexes: **THIA** (a), **OXA** (b), and **IMI** (c).

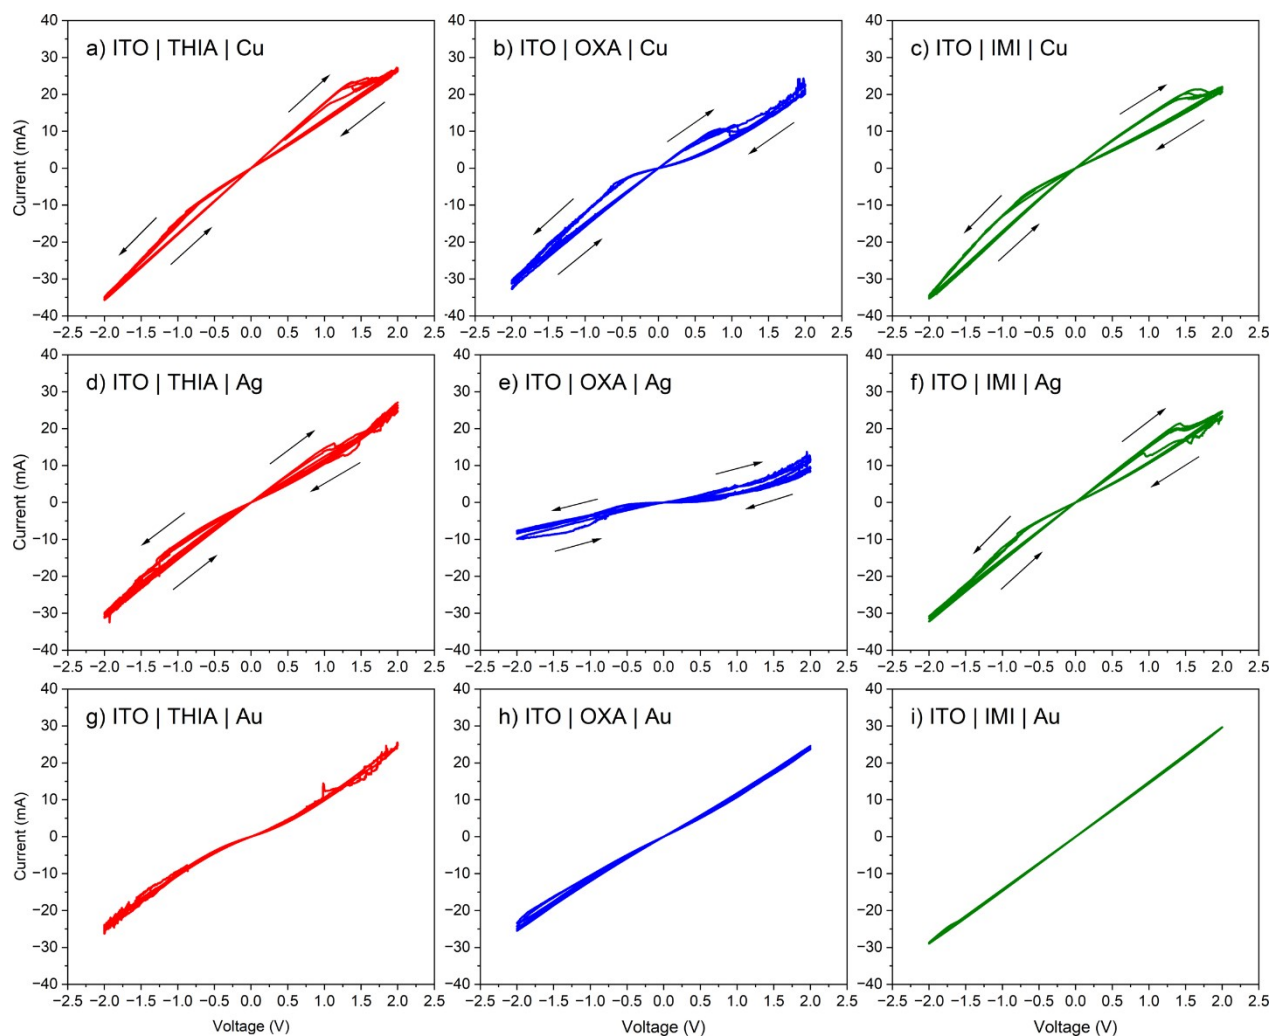

**Figure S14.** Current-voltage characteristics of memristive devices based on the studied 2-aminobenzazole chlorocuprates(II) complexes: **THIA** (a), **OXA** (b), and **IMI** (c) with different top electrodes: Cu (a-c), Ag (d-f), and Au (g-i).

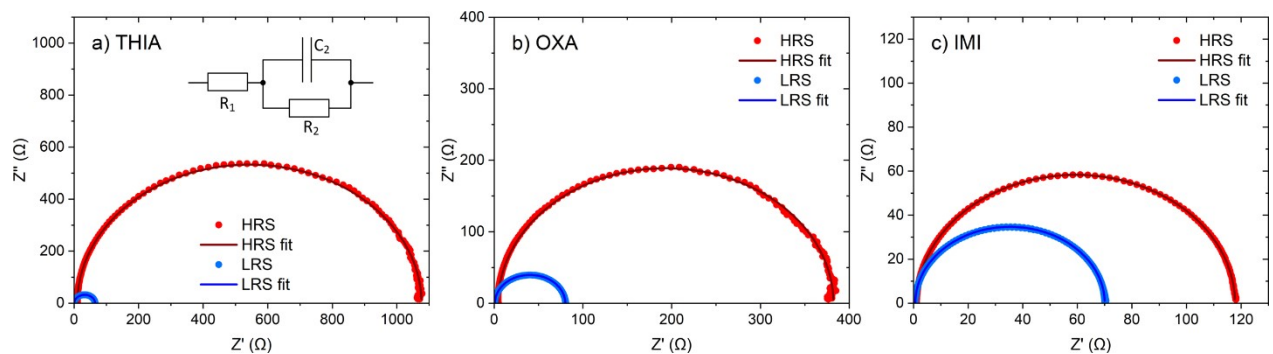

**Figure S15.** Nyquist plots showing experimental (points) and simulated (lines) results from electrochemical impedance spectroscopy (EIS) for the studied devices based on 2-aminobenzazoles chlorocuprates(II) complexes: **THIA** (a), **OXA** (b), and **IMI** (c) for LRS and HRS. The inset of a) shows the equivalent circuit model used for the simulations.

**Table S5.** Summary of the fitting parameters determined based on recorded EIS spectra for the studied devices based on 2-aminobenzazoles chlorocuprates(II) complexes: **THIA** (a), **OXA** (b), and **IMI** (c) complexes for low (LRS) and high resistance state (HRS), respectively.  $R_1$  is the electrode (series) resistance,  $R_2$  is the thin film (parallel) resistance, and  $C_1$  is the thin film capacitance (parallel).

|      | $R_1$ (series, electrode) |                  | $R_2$ (parallel, thin film) |                  | $C_1$ (parallel, thin film) |                       |
|------|---------------------------|------------------|-----------------------------|------------------|-----------------------------|-----------------------|
|      | LRS ( $\Omega$ )          | HRS ( $\Omega$ ) | LRS ( $\Omega$ )            | HRS ( $\Omega$ ) | LRS (F)                     | HRS (F)               |
| THIA | 0.57                      | 10.3             | 64.4                        | 1066             | $3.67 \times 10^{-5}$       | $2.12 \times 10^{-6}$ |
| OXA  | 0.77                      | 4.5              | 79.3                        | 377.8            | $3.01 \times 10^{-5}$       | $5.88 \times 10^{-6}$ |
| IMI  | 0.63                      | 1.09             | 69.4                        | 116.7            | $3.48 \times 10^{-5}$       | $2.04 \times 10^{-5}$ |

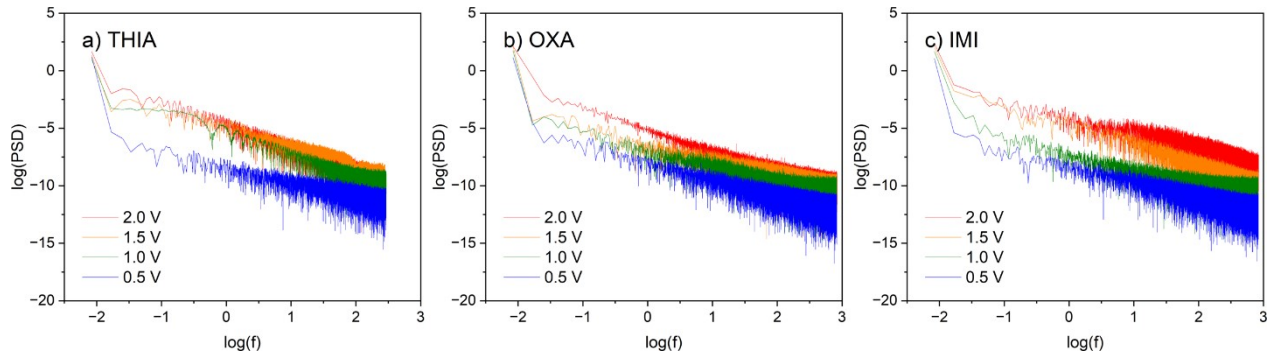

**Figure S16** Power spectral density plot for the studied devices based on 2-aminobenzazole chlorocuprates(II) complexes: **THIA** (a), **OXA** (b), and **IMI** (c) subjected to voltages from 0.5 to 2 V.

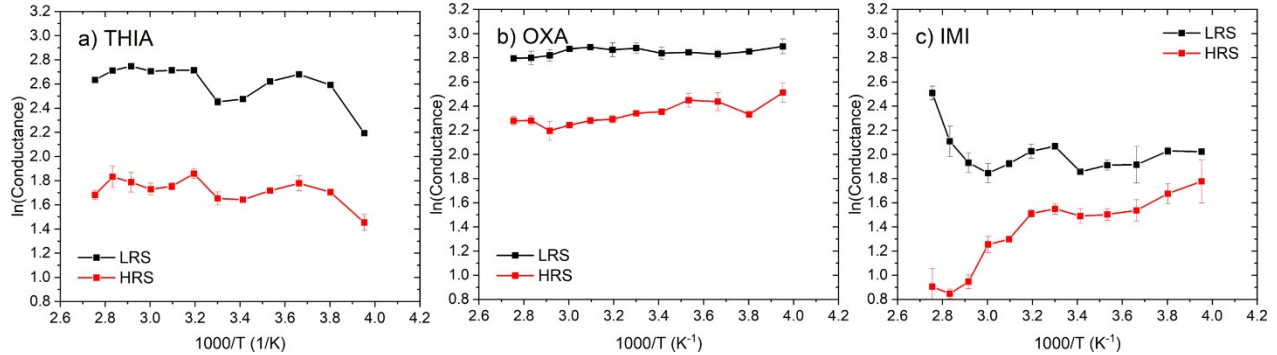

**Figure S17.** Arrhenius plots showing the temperature dependence of the natural logarithm of conductance (in mS) collected at +2 V (HRS) and -2 V (LRS).

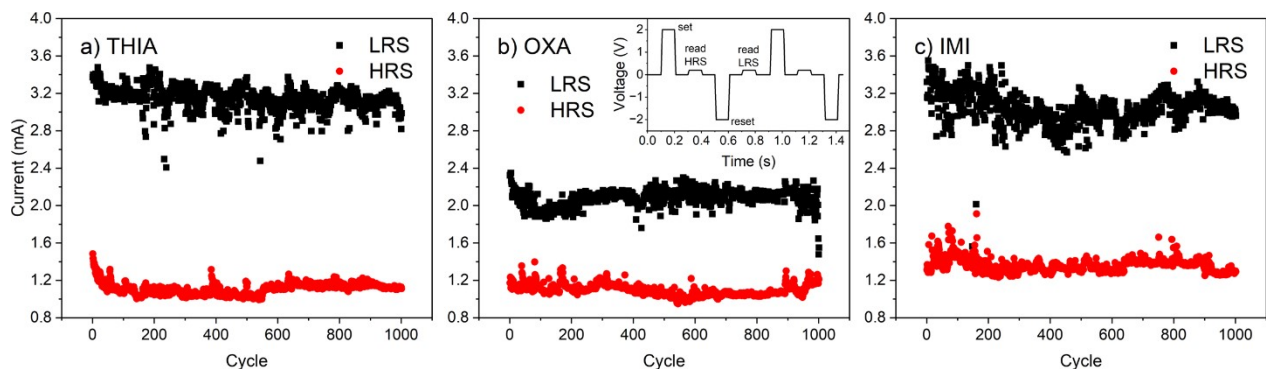

**Figure S18.** Chronoamperometric experiments showing repeated switching between HRS and LRS of devices based on 2-aminobenzazoles chlorocuprates(II) complexes: **THIA** (a), **OXA** (b), and **IMI** (c). The period of the cycle was 0.8 s. Read voltage equal to +0.2 V.

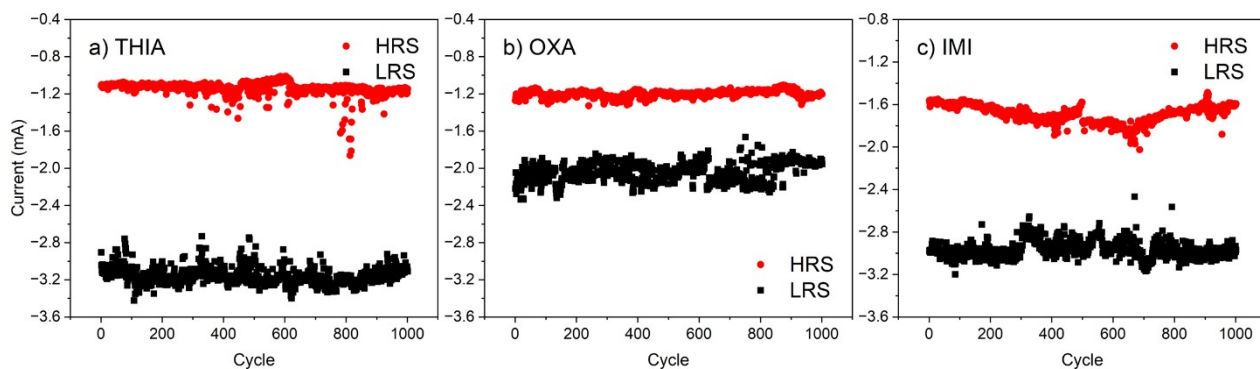

**Figure S19.** Chronoamperometric experiments showing repeated switching between HRS and LRS of devices based on 2-aminobenzazoles chlorocuprates(II) complexes: **THIA** (a), **OXA** (b), and **IMI** (c). The period of the cycle was 0.8 s. Read voltage equal to -0.2 V.

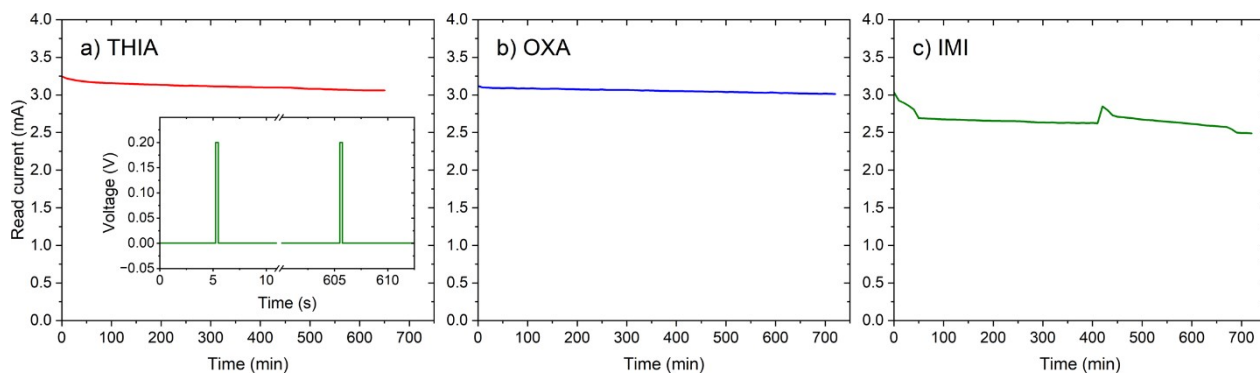

**Figure S20.** Chronoamperometric experiments showing retention time of LRS for the studied devices based on 2-aminobenzazoles chlorocuprates(II) complexes: **THIA** (a), **OXA** (b), and **IMI** (c). Figure a) inset shows the voltage change curve.

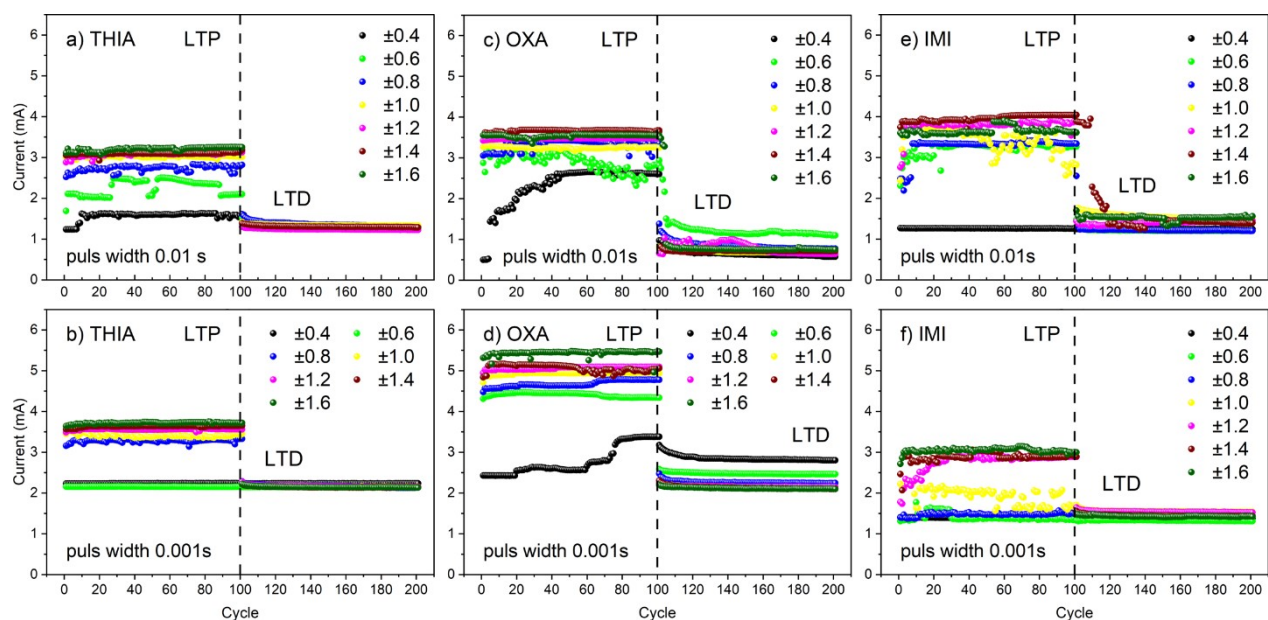

**Figure S21.** Potentiation (P) and depression (D) experiments for prepared devices based on 2-aminobenzazoles chlorocuprates(II) complexes: **THIA** (a, b), **OXA** (c, d), and **IMI** (e, f) with different pulse sequences of different widths (top: 0.001 s or bottom: 0.01 s) and amplitudes (in legend: 0.4-1.6 V).

## References

1. Sathyanarayananmoorthi, V.; Karunathan, R.; Kannappan, V., Molecular Modeling and Spectroscopic Studies of Benzothiazole. *Journal of Chemistry* **2013**, *2013* (1), 258519.
2. Kessentini, A.; Belhouchet, M.; Abid, Y.; Minot, C.; Mhiri, T., Crystal structure, vibrational studies, optical properties and DFT calculation of bis 2-aminobenzothiazolium tetrachloridocuprate. *Spectrochimica Acta Part A: Molecular and Biomolecular Spectroscopy* **2014**, *122*, 476-481.
